# Supplementary material for: Association Between Hepatitis B Viral Burden in Chronic Infection and a Functional Single Nucleotide Polymorphism of the PDCD1 Gene
Source: Springer Nature journal article supplement (doi:10.1007/s10875-010-9450-1), 2010-08-10
Supplement: MOESM2 [file 8907120]

**Table S2 Genotype distribution of P7209C/T or P8737A/G site in patients with chronic HBV**

**infection and healthy controls.**

| Genotype | HBV(502)  n (%) | Control(359)  n (%) | OR(95% CI) | P value |
| --- | --- | --- | --- | --- |
| C/C | 308 (61.4%) | 206 (57.4%) | 1.00 | - |
| C/T | 168 (33.5%) | 133 (37.0%) | 0.85  (0.64-1.15) | 0.293 |
| T/T | 26 (5.2%) | 20 (5.6%) | 0.99  (0.53-1.84) | 0.964 |
| Hardy-Weinberg  Equilibrium test | P=0.621 | P=0.808 |  |  |
| A/A | 248 (52.1%) | 177 (54.3%) | 1.00 | - |
| A/G | 197 (41.4%) | 127 (39.0%) | 1.11  (0.82-1.50) | 0.496 |
| G/G | 31 (6.5%) | 22 (6.7%) | 1.05  (0.58-1.88) | 0.879 |
| Hardy-Weinberg  Equilibrium test | P=0.327 | P=0.903 |  |  |

Multivariate logistic regression models were used to calculate odd ratios (95% confidence interval)

and corresponding P value for each genotype with SPSS. Genders were adjusted by inclusion in logistic

analysis. Hardy-Weinberg equilibrium was tested using a chi-square test with one degree of freedom to

compare observed genotype frequencies with expected genotype frequencies among the subjects for

the cases and controls separately.

.
